# Supplementary material
Source: Springer Nature journal article supplement (https://www.springermedizin.de/resource/supplementary/12865_2012_460_MOESM7_ESM.pdf/9428006)

### NP15

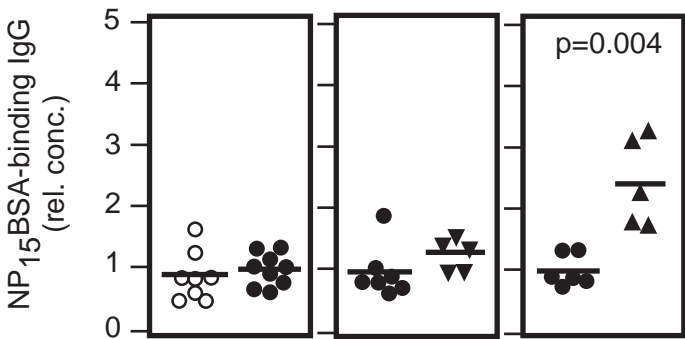

### NP1

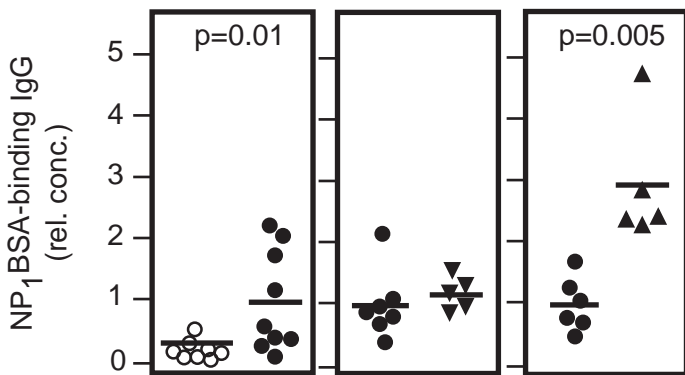

### NP1 / NP15

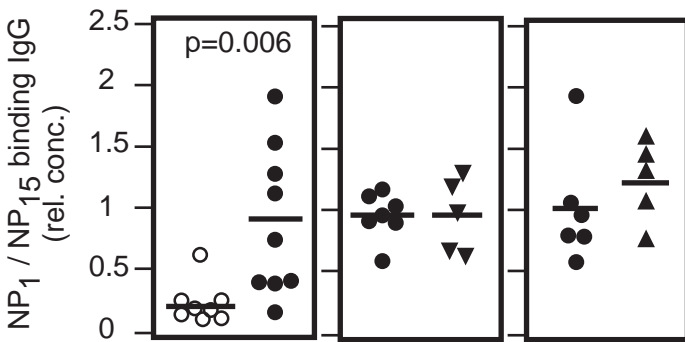

|            |   |   |   |   |   |
|------------|---|---|---|---|---|
| B-B7hTg    |   |   |   |   | + |
| DC-B7hTg   |   |   |   | + |   |
| Endog. B7h | - | + | + | + | + |

Supplement: MOESM7 [file 9428006]
